# Supplementary material for: Quantifying extracellular matrix turnover in human lung scaffold cultures
Source: PubMed Central journal article supplement (PMC5882971; doi:10.1038/s41598-018-23702-x), 2018-04-03
Supplement: 41598_2018_23702_MOESM1_ESM.pdf [file 41598_2018_23702_MOESM1_ESM.pdf]

## **Quantifying extracellular matrix turnover in human lung scaffold cultures**

**Oskar Rosmark<sup>1,\*</sup>, Emma Åhrman<sup>1,2</sup>, Catharina Müller<sup>1</sup>, Linda Elowsson Rendin<sup>1</sup>, Leif Eriksson<sup>1</sup>, Anders Malmström<sup>1</sup>, Oskar Hallgren<sup>1,3</sup>, Anna-Karin Larsson-Callerfelt<sup>1</sup>, Gunilla Westergren-Thorsson<sup>1,†</sup>, Johan Malmström<sup>2,†</sup>**

<sup>1</sup> Lung Biology, Dept. Experimental Medical Science, Lund University, Sweden

<sup>2</sup> Division of Infection Medicine, Dept. Clinical Sciences, Lund University, Sweden

<sup>3</sup> Dept. Respiratory Medicine and Allergology, Lund University, Sweden

\* Corresponding author. *E-mail address*: oskar.rosmark@med.lu.se

†these authors contributed equally to this work

## Supplementary Material:

### Supplementary Figure S1

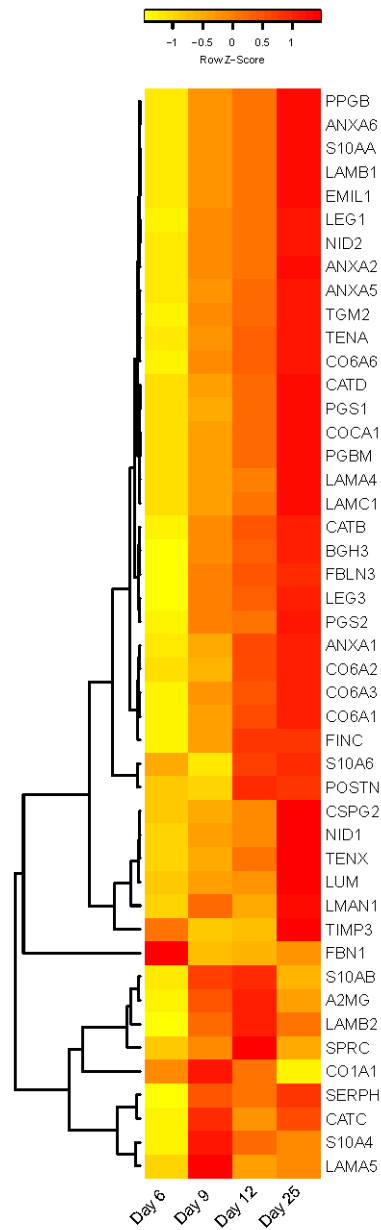

**Supplementary Figure S1. New-to-old ratios for matrisome proteins in scaffold cultures.** Heat map showing the temporal profiles for the ratios between matrisome proteins produced in scaffold culture (new) to the proteins originally present in the scaffold (old), data scaled by row.

## Supplementary Figure S2

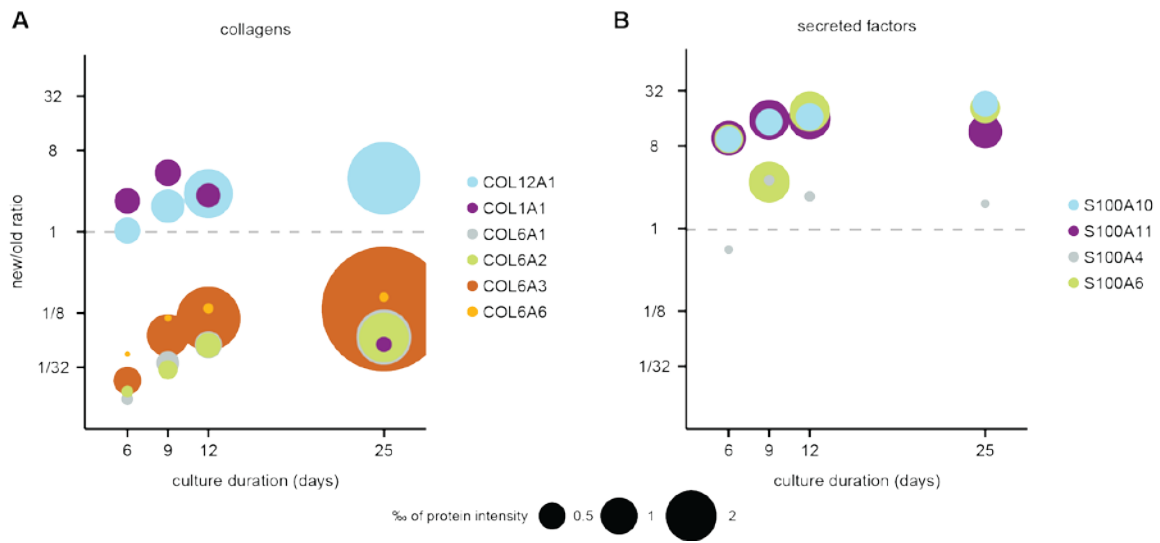

**Supplementary Figure S2. Additional matrisome protein turnover profiles in scaffold cultures.** Weighted scatter plots of (A) collagens and (B) secreted factors. Amount of newly synthesized proteins are represented by the size of the data points, ratio of new to old protein displayed on Y-axis with equal amount of new and old proteins at the dashed line.

### Supplementary Figure S3

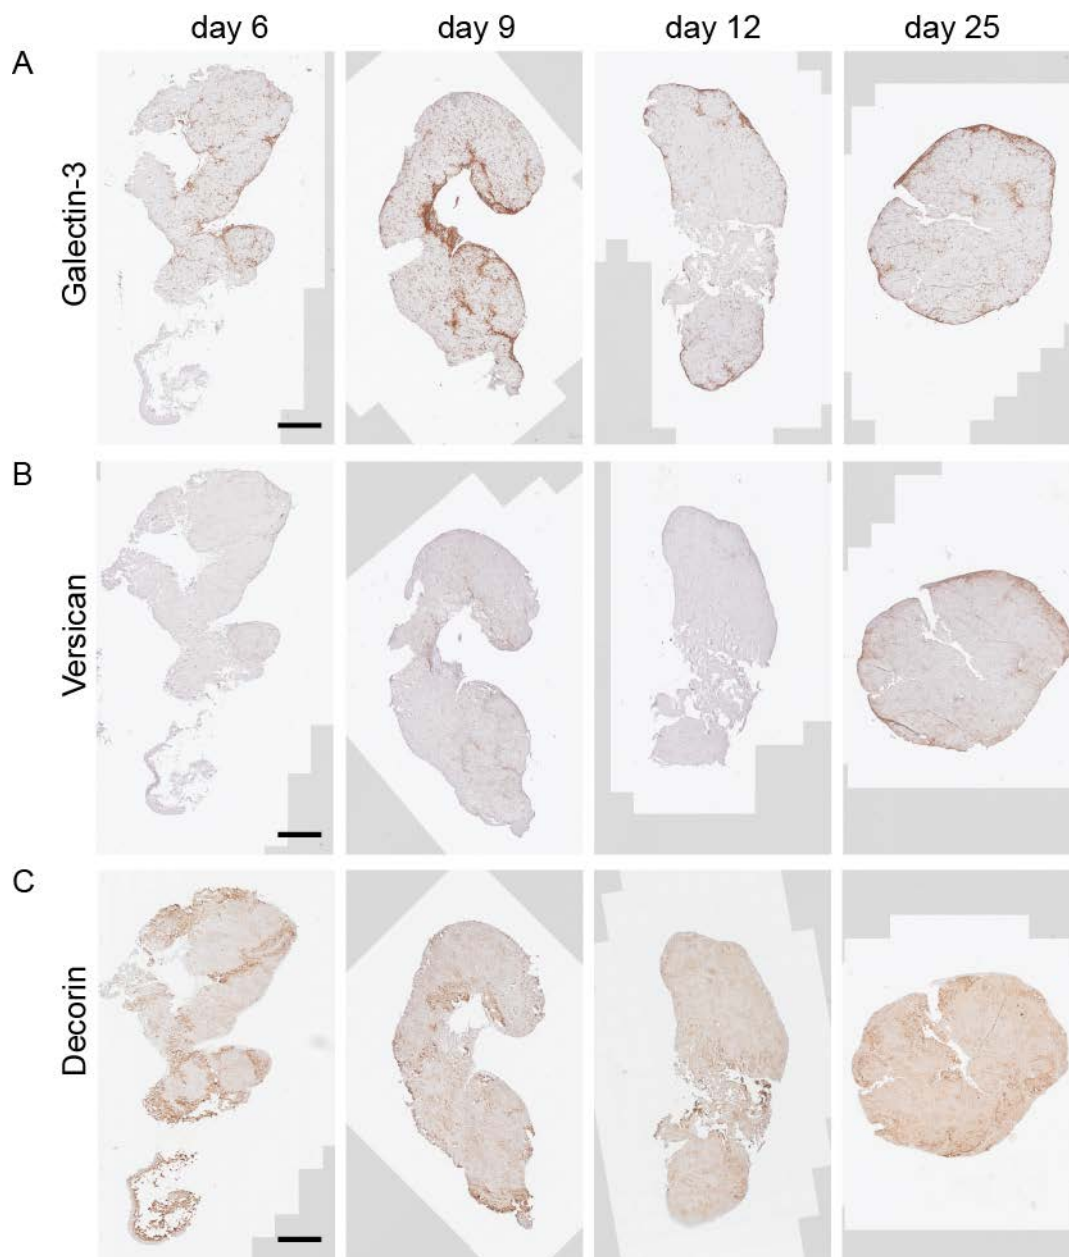

**Supplementary Figure S3. Overview images of whole immunohistologically stained tissue sections.** Representative magnified images are seen in Figure 6. Staining for (A) galectin-3, (B) versican and (C) decorin. Positive staining in brown. Scale bar 500  $\mu$ m. The pictures visualize the compaction of the scaffolds over time by the fibroblasts.

## Supplementary Figure S4

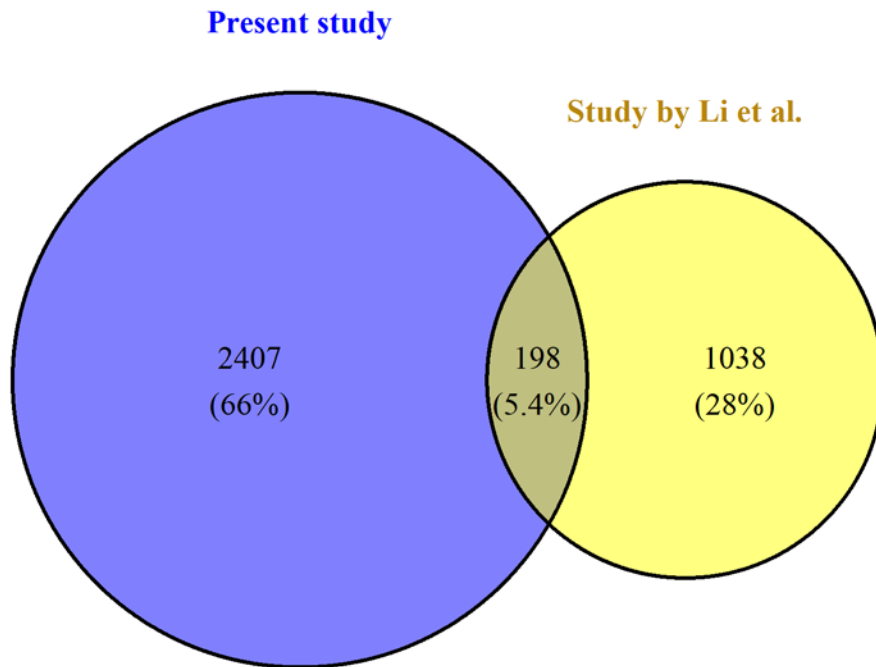

**Supplementary Figure S4. Identified protein in our data compared to analogous study with scaffold from vocal fold mucosa by Li et al\*.** Euler diagram showing number of proteins identified by mass spectrometry in repopulated scaffolds that is shared between and unique for the two data sets.

\* Q. Li, Z. Chang, G. Oliveira, M. Xiong, L.M. Smith, B.L. Frey, N. V. Welham, Protein turnover during in vitro tissue engineering, *Biomaterials*. 81 (2016) 104–113.

**Supplementary Table S1.**

| Primary antibody | Manufacturer                                                            | Antigen retrieval                                                   | Dilution | Secondary antibody                            |
|------------------|-------------------------------------------------------------------------|---------------------------------------------------------------------|----------|-----------------------------------------------|
| Collagen type IV | Abcam, Cambridge, MA, US, ab6586                                        | heat mediated:<br>EnVision™ FLEX Target Retrieval Solution, Low pH  | 1:1000   | Alexa Fluor® 647 (Invitrogen, Eugene, OR, US) |
| Ki-67            | Abcam, ab15580                                                          | heat mediated:<br>EnVision™ FLEX Target Retrieval Solution, Low pH  | 1:1000   | Alexa Fluor® 647 (Invitrogen, Eugene, OR, US) |
| Vimentin         | R&D, AF2105                                                             | heat mediated:<br>EnVision™ FLEX Target Retrieval Solution, Low pH  | 1:100    | Alexa Fluor® 555 (Invitrogen, Eugene, OR, US) |
| Versican         | Atlas Antibodies, Uppsala, Sweden<br>HPA004726                          | Chondroitinase ABC*                                                 | 1:750    | Envision, Dako K4065                          |
| Galectin-3       | monoclonal, hybridoma supernatant†, kind gift from Prof. Hakon Leffler# | Chondroitinase ABC*                                                 | 1:50     | Goat anti-rat HRP<br>Sigma A9037              |
| Decorin          | Atlas Antibodies, Uppsala, Sweden<br>HPA003315                          | heat mediated:<br>EnVision™ FLEX Target Retrieval Solution, High pH | 1:1000   | Envision, Dako K4065                          |

\*0,025 U/ml chondroitinase ABC in special TBS (0.1 M Tris, 0.3 M NaCl, pH 7.6) for 30 min at 37°C

# Dept. for Microbiology, Immunology and Glycobiology, University of Lund, Sweden

† M.K. Ho, T.A. Springer, Mac-2, a novel 32,000 Mr mouse macrophage subpopulation-specific antigen defined by monoclonal antibodies., J. Immunol. 128 (1982) 1221–8.
